# Supplementary material
Source: PubMed Central journal article supplement (PMC6542607)

### **Supplementary Figure 1. Cell processing schema.**

Following a two day apheresis collection, cells undergo CD34 bead selection, followed by CD25 bead selection of the CD34 negative flow-through fraction. After CD25 enrichment, cells were stained with mAb against CD4 and CD127 and then further purified by flow cytometric sorting of CD4+CD127(dim) cells. At the time of apheresis, a fraction of apheresis product is removed and cryopreserved to provide the CD3 fraction.

### **Supplementary Figure 2. Dose escalation schema and DLT definition.**

### **Supplementary Figure 3. Example mixed lymphocyte reaction suppression assay.**

Proliferation of responder T cells were assessed by CFSE staining and flow cytometry (upper panels and lower left panel) and thymidine incorporation assay (lower right panel). Ratio of responders T cells (R) to target antigen presenting cells (S) and Treg (T) are provided. All assays repeated in triplicate, with significance of  $<0.01$  (\*\*) by two-tailed student T test.

### **Supplementary Figure 4. Day of neutrophil and platelet engraftment after hematopoietic stem cell transplantation.**

**Supplementary Figure 5. Treg phenotype by treatment group.** Peripheral blood Treg cell expression of surface and intracellular assessed by CyTOF on day +30 after HSCT. with Significance indicated as  $<0.05$ (\*) and  $<0.01$  (\*\*) by two-tailed student T test.

Supplementary Figure 1.

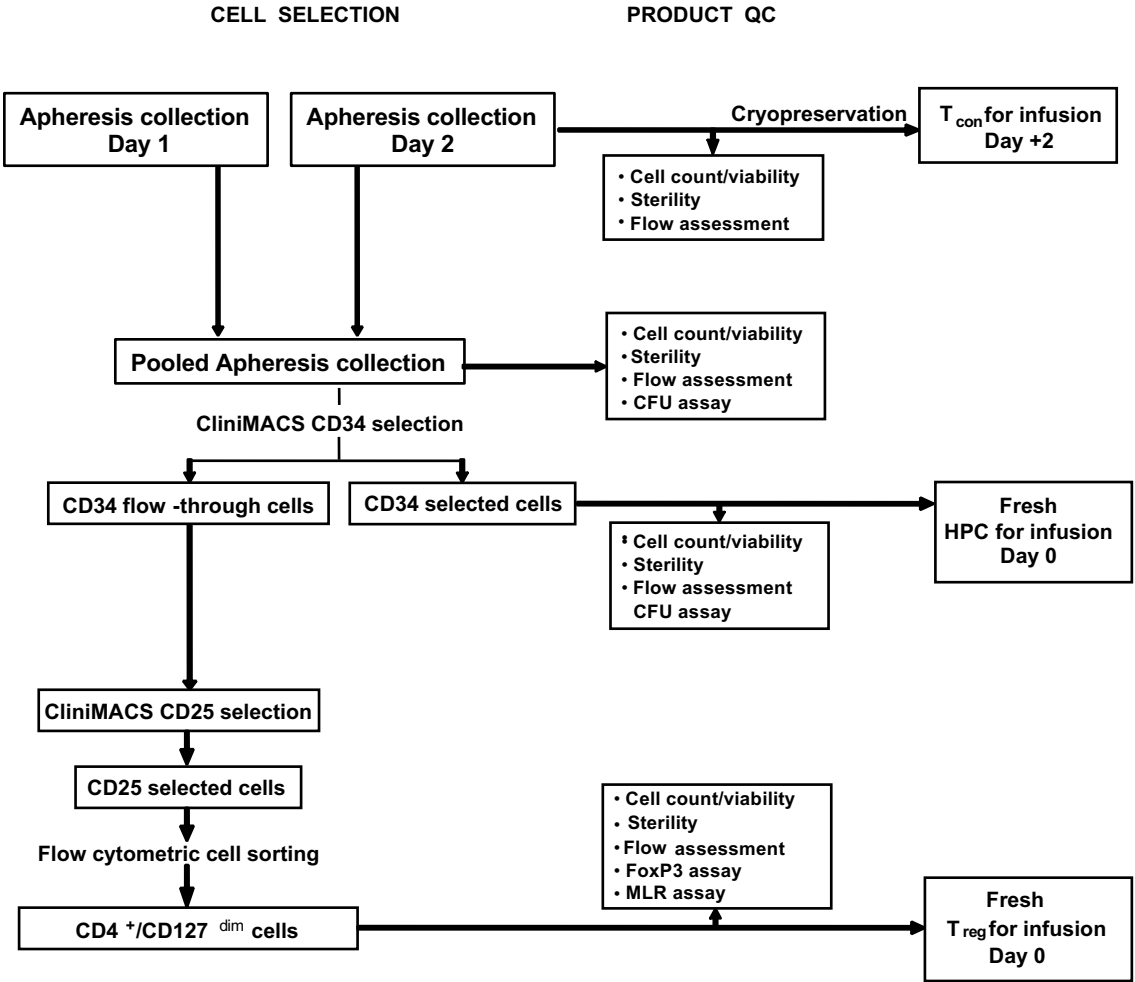



### Supplementary Figure 3.

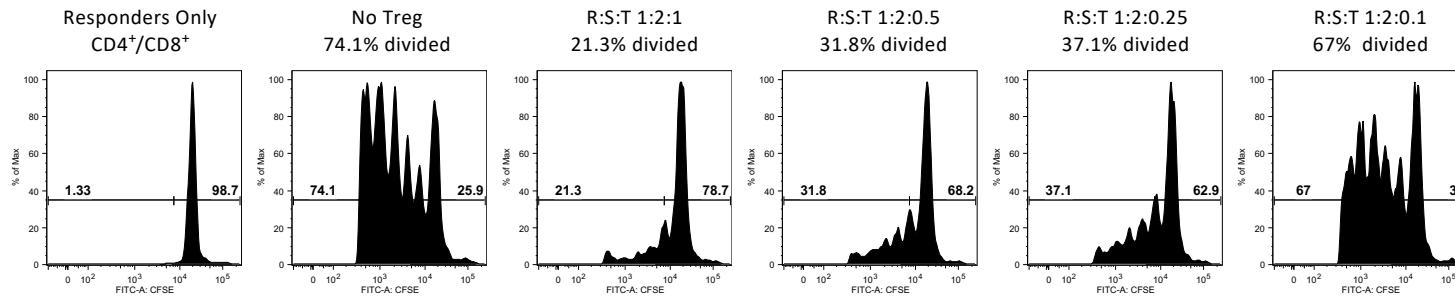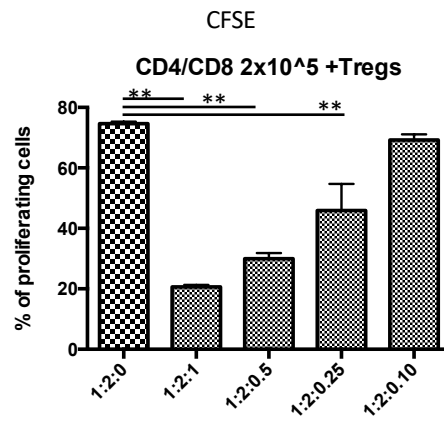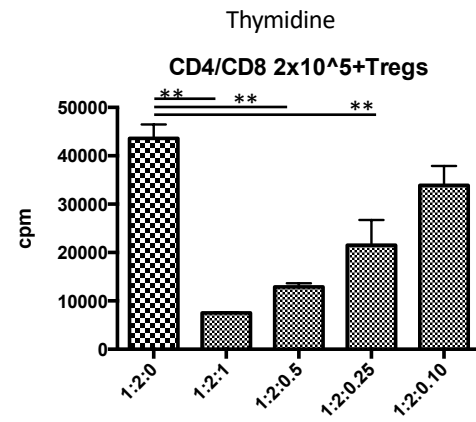

### Supplementary Figure 4.

|                               | <b>Subject</b> | <b>Neutrophil engraftment (Day+)</b> | <b>Platelet engraftment (Day+)</b> |
|-------------------------------|----------------|--------------------------------------|------------------------------------|
|                               | 5126           | 11                                   | 17                                 |
| Initial protocol:             | 5201           | 10                                   | 14                                 |
| <b>Frozen T<sub>reg</sub></b> | 5534           | 19                                   | 25                                 |
|                               | 5902           | 11                                   | 16                                 |
|                               | 6157           | 11                                   | 15                                 |
|                               | 6666           | 14                                   | 16                                 |
|                               | 6708           | 11                                   | 14                                 |
| Modified protocol:            | 6784           | 12                                   | 10                                 |
| <b>Fresh T<sub>reg</sub></b>  | 6820           | 12                                   | 10                                 |
|                               | 6857           | 11                                   | 9                                  |
|                               | 6948           | 14                                   | 10                                 |
|                               | 7011           | 15                                   | 22                                 |
|                               | <b>Range</b>   | 9 (10 – 19)                          | 16 (9 – 25)                        |
|                               | <b>Median</b>  | 11                                   | 16                                 |

Supplementary  
Figure 5

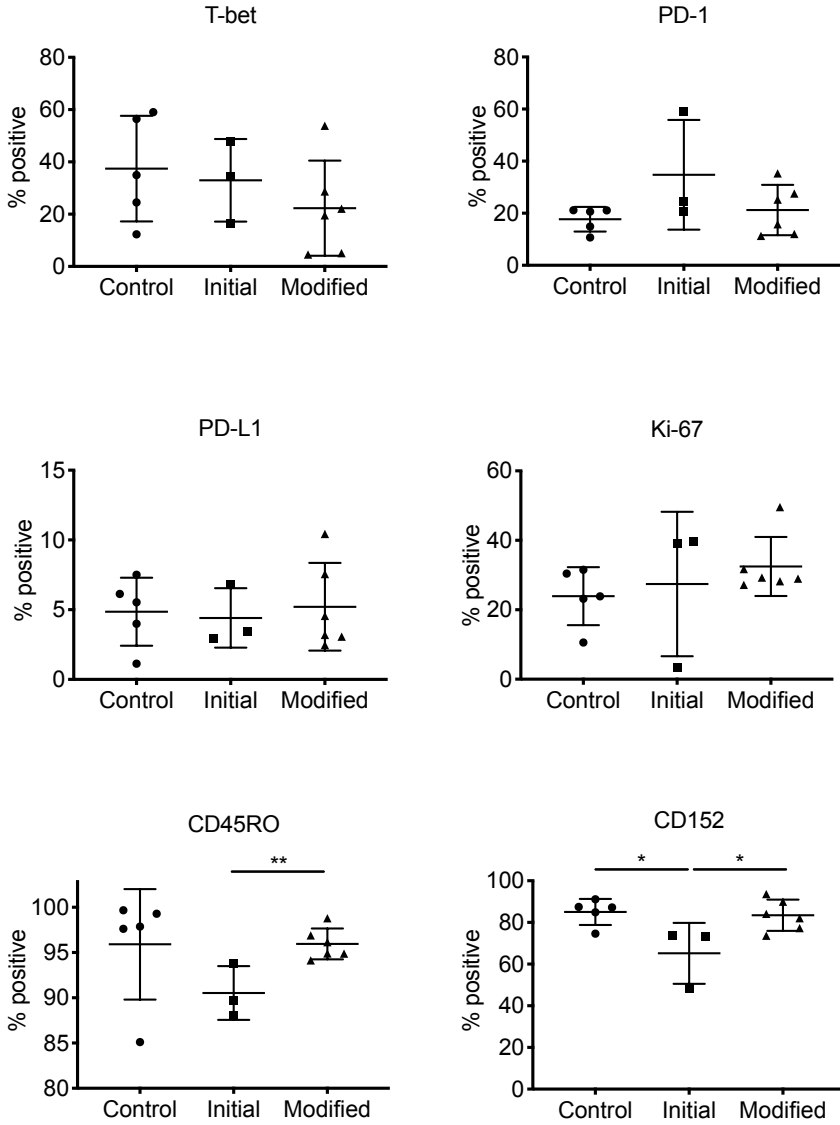

Supplement: jciinsight-4-127244-s136.pdf [file jciinsight-4-127244-s136.pdf]
